# Supplementary material
Source: PubMed Central journal article supplement (PMC3368684)
Supplement: cn1000364_si_001.pdf [file cn1000364_si_001.pdf]

## Supporting Information

*In vivo* evaluation of limiting brain penetration of probes for  $\alpha_{2C}$ -adrenoceptor by small-animal positron emission tomography study

Kazunori Kawamura,<sup>\*,†</sup> Megumi Akiyama,<sup>†</sup> Joji Yui,<sup>†</sup> Tomoteru Yamasaki,<sup>†</sup> Akiko Hatori,<sup>†</sup> Katsushi Kumata,<sup>†</sup> Hidekatsu Wakizaka,<sup>†,‡</sup> Makoto Takei,<sup>†,§</sup> Nobuki Nengaki,<sup>†,#</sup> Kazuhiko Yanamoto,<sup>†,¶</sup> Toshimitsu Fukumura,<sup>†</sup> and Ming-Rong Zhang<sup>†</sup>

<sup>†</sup>Department of Molecular Probes and <sup>‡</sup>Department of Biophysics, Molecular Imaging Center, National Institute of Radiological Sciences, Chiba 263-8555, Japan, <sup>§</sup>Tokyo Nuclear Services Co., Ltd., Tokyo 110-0005, Japan, <sup>#</sup>SHI Accelerator Service Ltd., Tokyo 141-0032, Japan. <sup>¶</sup>Division of Health Sciences, Graduate School of Medicine, Osaka University, Suita 565-0871, Japan

### Contents

1. HPLC chart of compound **6**
2. HPLC chart of MBF
3. HPLC chart of compound **11**

## 1. HPLC chart of compound 6

Condition: column, Capcell Pak C18 UG 80 (4.6 mm internal diameter × 250 mm length; Shiseido); elution, 0.1 mol/l ammonium formate (50:50, v/v); flow rate, 2.0 ml/min; retention time of compound 6 was 3.5 min.

Chemical purity: 98.7 %

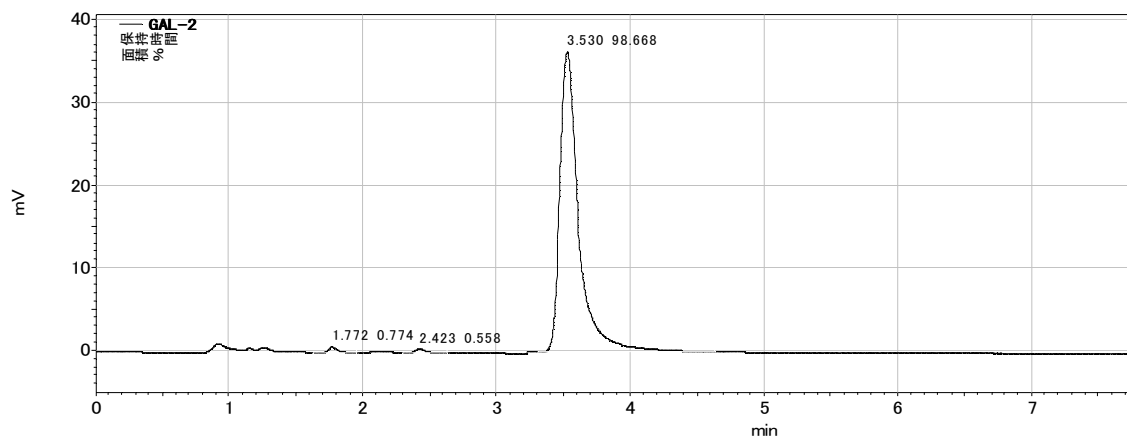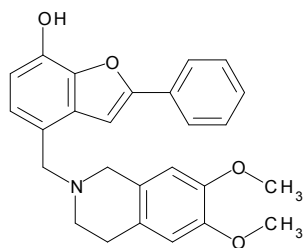

Compound 6

## 2. HPLC chart of MBF

Condition: column, Capcell Pak C18 UG 80 (4.6 mm internal diameter × 250 mm length; Shiseido); elution, 0.1 mol/l ammonium formate (60:40, v/v); flow rate, 2.0 ml/min; retention time of compound 6 was 7.5 min.

Chemical purity: 98.7 %

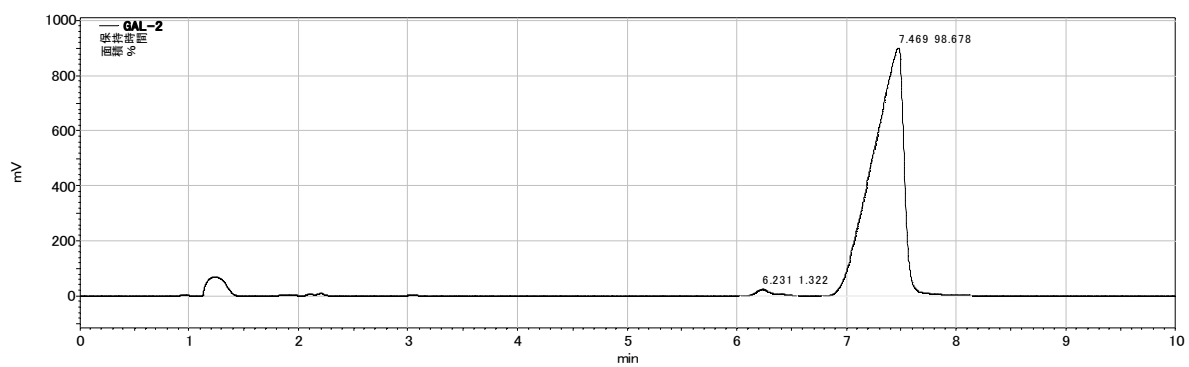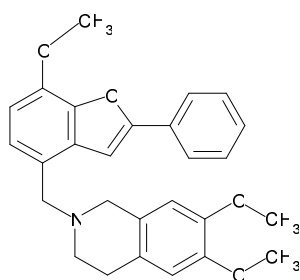

**MBF**

### 3. HPLC chart of compound **11**

Condition: column, X Bridge C18 (4.6 mm internal diameter × 150 mm length; Waters);  
elution, acetonitrile and 0.1% triethylamine in water (40:60, v/v); flow rate, 1.5 ml/min;  
retention time of compound **11** was 3.7 min.

Chemical purity: 95.2 %

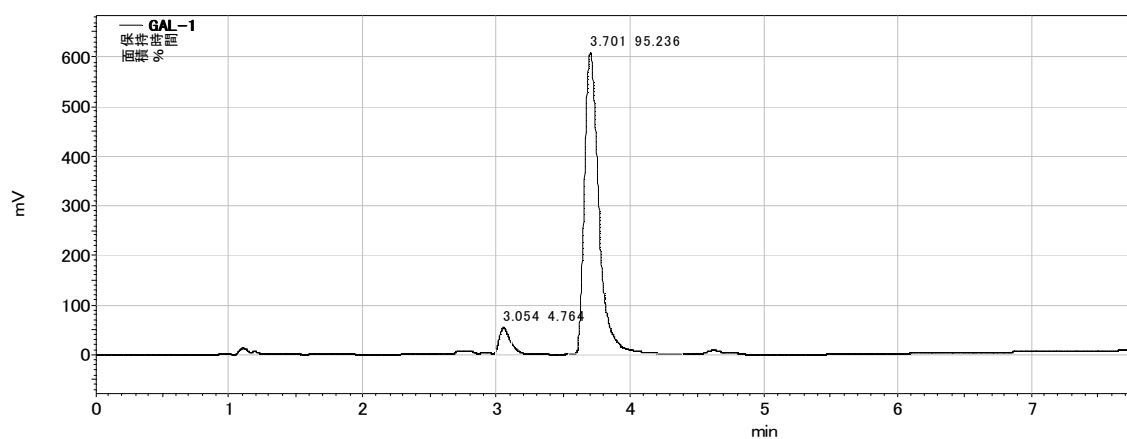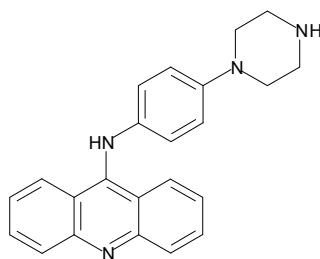

Compound **11**
